# Nucleated transcriptional condensates amplify gene expression

Ming-Tzo Wei<sup>1</sup>, Yi-Che Chang<sup>1,2</sup>, Shunsuke F. Shimobayashi<sup>1,3</sup>, Yongdae Shin<sup>1,4,5</sup>, and Clifford P. Brangwynne<sup>1,6\*</sup>

1. Department of Chemical and Biological Engineering, Princeton University, Princeton, NJ 08544 USA
2. Department of Chemistry, Princeton University, Princeton, NJ 08544, USA
3. Department of Mathematical Science and Advanced Technology, Japan Agency for Marine-Earth Science and Technology, Yokohama, 236-0001, Japan
4. Department of Mechanical and Aerospace Engineering, Seoul National University, Seoul 08826, Korea
5. Interdisciplinary Program in Bioengineering, Seoul National University, Seoul 08826, Korea
6. Howard Hughes Medical Institute

\*correspondence: [cbrangwy@princeton.edu](mailto:cbrangwy@princeton.edu)

## Abstract

Liquid-liquid phase separation is thought to underly gene transcription, through the condensation of the large-scale nucleolus, or in smaller assemblies known as transcriptional hubs or condensates. However, phase separation has not yet been directly linked with transcriptional output, and our biophysical understanding of transcription dynamics is poor. Here, we utilize an optogenetic approach to control condensation of key FET-family transcriptional regulators, particularly TAF15. We show that amino acid sequence-dependent phase separation of TAF15 is enhanced significantly due to strong nuclear interactions with the C-terminal domain (CTD) of RNA Pol II. Nascent CTD clusters at primed genomic loci lower the energetic barrier for nucleation of TAF15 condensates, which in turn further recruit RNA Pol II to drive transcriptional output. These results suggest a model in which positive feedback between key transcriptional components drives intermittent dynamics of localized phase separation, to amplify gene expression.

Cells organize complex biochemical reactions through compartmentalization into various organelles. Many of these organelles are membrane-less condensates, which form through liquid-liquid phase separation (LLPS), in which biomolecules condense into dynamic liquid droplets<sup>1-4</sup>. Nuclear condensates are thought to play key roles in regulating the flow of genetic information and include a diverse set of structures ranging from large scale assemblies such as nuclear speckles and the nucleolus, to structures that form on smaller length scales such as Cajal bodies, promyelocytic leukemia (PML) bodies, and gems.

The concept that LLPS can drive transcriptional activity has recently received intense attention. The nucleolus is a large nuclear condensate which assembles around actively transcribing ribosomal RNA (rRNA) loci<sup>5,6</sup>, and is thought to facilitate the processing and maturation of rRNA into pre-ribosomal particles. Smaller transcriptional condensates have been proposed to assemble throughout the genome to facilitate transcription of non-ribosomal genes through the RNA polymerase II (Pol II) machinery<sup>7-10</sup>. These nanoscale transcriptional condensates have been hypothesized to facilitate enhancer-promoter interactions<sup>11-13</sup>, possibly through the generation of localized force through surface-tension driven droplet coalescence<sup>14</sup>.

Transcriptional condensates and other nuclear bodies are enriched in nucleic acid-binding proteins containing large intrinsically disordered proteins or regions (IDPs/IDRs), closely related to low complexity sequences (LCS) and prion-like domains (PrLD). The amino acid sequences of IDRs encode an intrinsic preference for conformational heterogeneity and do not fold into a single three-dimensional structure. IDRs have been shown in numerous studies to promote phase separation<sup>15-19</sup>, although how specificity emerges from their sequence-encoded interactions is still largely unclear.

Of particular interest are members of the FET protein family, consisting of the proteins FUS (fused in sarcoma or translocated in liposarcoma), EWS (Ewing's sarcoma), and TAF15 (TATA-binding protein-associated factor 2N), which play roles not only in transcription but also in pre-mRNA splicing, DNA repair, and mRNA transport in neurons<sup>20</sup>. FUS, EWS, and TAF15 all contain an N-terminal IDR enriched in uncharged polar amino acids and aromatic amino acids (Fig. S1), an RNA-binding motif (RNA-recognition motif, RRM), and a R/G (arginine/glycine)-rich domain (Fig. 1A). While recent *in vitro* studies have begun to explore the role of these amino acids in defining molecular interactions and specificity<sup>21-23</sup>, this remains poorly understood, particularly within living cells. Moreover, whether and how sequence-encoded phase behavior can determine functional transcriptional outputs, and their reported intermittent dynamics<sup>24</sup>, remains to be tested.

## Results

### Molecular interaction strength drives intracellular phase behavior

The valence of IDR-rich proteins is often enhanced through binding to multiple genomic elements<sup>17,18</sup>, or through direct oligomerization<sup>25</sup>. To address the question of the sequence-dependent transcriptional function of FET family proteins, we took advantage of the recently developed optoDroplet system<sup>26</sup>, which utilizes blue-light controlled oligomerization of the Cryptochrome 2 (Cry2) protein to control IDR oligomerization, and thus drive phase separation<sup>20,27</sup>. In agreement with earlier work, we find that blue light drives phase separation of an optoFUS construct into liquid-like droplets in both the cytoplasm and nucleoplasm of NIH 3T3 cells (Fig. 1B and Fig. S2). Consistent with the physics of classical phase separation, blue light-illuminated cells expressing different optoFUS concentrations reveal that the cytoplasmic concentration ( $C_{\text{cyto}}$ ) begins to plateau at a saturation concentration ( $C^*$ ) at roughly  $C^*_{\text{cyto}} = 2.4 \pm 0.4 \mu\text{M}$  (Fig. 1C). We observe similar behavior with an optoEWS construct and an optoTAF15 construct, which consist of Cry2 fused to the IDR/LCS regions of EWS and TAF15, respectively (Fig. 1C). Interestingly, however, optoTAF15 only phase separates in the cytoplasm at significantly higher concentrations,  $C^*_{\text{cyto}} = 8.0 \pm 0.6 \mu\text{M}$ , which is roughly 3-fold higher than the saturation concentration for nucleoplasmic optoTAF15 ( $2.6 \pm 0.5 \mu\text{M}$ ; Fig. 1D). Thus, nucleoplasmic optoTAF15 has a significantly enhanced tendency to phase separate in the nucleoplasm compared to the cytoplasm, whereas other constructs tested exhibit only moderate differences between the cytoplasmic and nucleoplasmic saturation concentration (Fig. 1D, inset).

To examine the biophysical origins of this surprising TAF15 phase behavior, we utilize fluorescence correlation spectroscopy (FCS) to estimate molecular interaction strength. An effective interaction strength,  $\beta$ , is determined by measuring protein diffusivity as a function of protein concentration, and analyzing the data using the relation  $D = D_0 (1 + \beta C)$  (Eqn. 1) where  $D$

is protein diffusivity,  $D_0$  is the diffusivity at infinite dilution, and  $C$  is the protein concentration<sup>28, 29</sup>. In the absence of blue light illumination, optoTAF15 diffusivity decreases with increasing protein concentration (Fig. 1E), which indicates an attractive molecular interaction. However, optoTAF15 exhibits significantly stronger interactions in the nucleoplasm compared to the cytoplasm (i.e.  $\beta_{\text{Nuc}}$  is more negative than  $\beta_{\text{Cyto}}$ ). OptoFUS also has slightly stronger interactions in the nucleoplasm, but not nearly as large as for optoTAF15. OptoEWS and a control construct optoDDX4 both exhibit no significant difference between their cytoplasmic and nucleoplasmic interaction strengths (Fig. 1E inset). For all constructs tested, the apparent molecular interaction strength in the absence of blue light illumination can be plotted against the saturation concentration for optoIDRs under blue light illumination, yielding a common intracellular phase boundary (Fig. 1F). These findings suggest that IDR-driven phase separation exhibits remarkably universal features, and that the enhanced tendency for optoTAF15 to phase separate in the nucleoplasm compared with the cytoplasm reflects its correspondingly stronger intermolecular interactions there (Fig. 1E and 1F).

### **Transcriptional condensates colocalize with and recruit unphosphorylated CTD**

We next sought to understand the origin of TAF15's increased interaction strength and preferential condensation in the nucleoplasm. TAF15 is a key transcriptional regulator and has been shown to interact with the C-terminal domain (CTD) of Pol II<sup>27, 30</sup>. We co-expressed the optoIDR constructs along with EGFP-tagged Pol II CTD construct consisting of a 52-repeat of the heptad consensus amino acid sequence YSPTSPS. We find that optoTAF15 droplets exhibit a nearly 4-fold preferential partitioning of CTD (Fig. 2A and 2B). As a negative control, there is no preferential partitioning of EGFP-CTD into induced optoDDX4 droplets. OptoEWS droplets similarly exhibit no CTD recruitment, while optoFUS exhibits a 2-fold enrichment of CTD (Fig. 2A and 2B).

TAF15 exhibits a distribution of charged amino acid residues along its IDR, notably arginine (R), which is known to interact with tyrosine (Y) residues on CTD through cation- $\pi$  interactions, and negatively charged aspartic acid (D), which electrostatically interacts with lysine (K) on CTD<sup>30</sup>. To test those interactions, we mutated optoTAF15 (optoTAF15-10RD) to reduce its charge by replacing arginine (R) with glutamine (Q), and aspartic acid (D) with serine (S) (Fig. S1). CTD partitioning is significantly diminished in the charge-reduced optoTAF15-10RD droplets (Fig. 2A and 2B). Moreover, the optoTAF15-10RD construct has a significantly weakened tendency to phase separate, as indicated by its higher saturation concentration in nucleoplasm (Fig. 2C). Taken together, these data suggest that charge-mediated interactions between TAF15 and CTD contribute to TAF15's preferential condensation in the nucleoplasm.

Pol II CTD is known to undergo cycles of post-translational modifications to regulate transcriptional activity, including phosphorylation<sup>27</sup>, which alters charge-mediated interactions. Among these regulators is CDK7, a key kinase which negatively regulates the ability of CTD to function as a transcriptional scaffold<sup>31</sup>. To test whether the phosphorylation state of CTD influences optoTAF15's propensity to phase separate, we utilized the CDK7 inhibiting drug THZ1<sup>32, 33</sup>. We find that THZ1 treatment decreases the nucleoplasmic saturation concentration of optoTAF15, suggesting unphosphorylated CTD more strongly interacts with optoTAF15 to promotes its phase separation. Consistent with this interpretation, no significant change in the optoTAF15 saturation concentration is observed in the cytoplasm, where CTD is absent (Fig.

2C). Moreover, the partition coefficient of CTD into nuclear droplets strongly correlates with the difference between nucleoplasmic and cytoplasmic saturation concentrations (Fig. 2D). Thus, the degree of CTD phosphorylation modulates phase separation of transcriptional IDRs in the nucleus, and this effect correlates with the apparent interaction between CTD and the transcriptional IDRs.

### **Pol II CTD clusters impact the nucleation kinetics of transcriptional condensates**

We reasoned that this tendency for CTD to enhance phase separation of TAF15 should exhibit strong spatial variability, as Pol II is not evenly distributed throughout the nucleoplasm, but instead is enriched in transcriptionally active regions<sup>34,35</sup>. To examine whether optoTAF15 constructs exhibit any pattern to where and when they condense, we performed blue light cycling experiments where TAF15 condensates are induced to repeatedly phase separate, dissolve, and then again phase separate. We found that some of the optoTAF15 condensates reform in the same physical locations, but that these repetitively forming droplets are transient, and after several cycles they no longer form (Fig. 3 A and 3B). This behavior is in marked contrast to control optoDDX4 droplets, which appear at random locations where they were not found in previous cycles (Fig. S3). To test whether stabilizing endogenous Pol II clusters would alter optoTAF15 behavior in cycling experiments, we treated cells with actinomycin D (Act D), a drug that blocks transcriptional elongation and thus locks Pol II at its promoter-proximal pausing stage<sup>36,37</sup>. Act D-treated cells show repetitive localization of optoTAF15 to the same locations in subsequent light illumination cycles, consistent with Pol II remaining locked at high concentrations around specific transcriptional loci, thereby acting as stable nucleation sites for optoTAF15 condensation (Fig. 3C and 3D).

To further examine the hypothesis that native Pol II clusters provide high concentration CTD seeds that nucleate TAF15-rich condensates, we used an engineered system that stably localizes CTD to telomeres, by fusing the telomere associated protein TRF1 to EGFP-CTD (TRF1-CTD). As expected, TRF1-CTD appears as bright puncta, localized at telomeres. In light cycling experiments, the optoTAF15 condensates induced at telomeres always assemble and dissolve at the same locations; unlike the dynamic endogenous Pol II clusters, these engineered CTD foci provide long-term stable nucleation sites for optoTAF15 (Fig. 3E and 3F).

Classical nucleation theory describes how localized “seeds” can decrease the energetic barrier to nucleation, and thus increase nucleation rate (or decrease the delay time until nucleation onset)<sup>38</sup>. To quantitatively test this prediction of nucleation kinetics, we measured the nucleation delay time (dt), and find that optoTAF15 at TRF1-CTD clusters nucleates significantly faster than optoTAF15 condensates that form elsewhere in the nucleus (Fig. 3G and 3H). The delay time of optoTAF15 condensates formed in these cells away from the TRF1-CTD clusters is similar to that of condensates forming in non-TRF1-CTD expressing cells (Fig. 3 I),  $dt = 59.9 \pm 9.2$ , and  $dt = 52.1 \pm 13.0$  second, respectively. By contrast, the delay time distribution around TRF-CTD clusters are shifted to significantly lower times,  $dt = 32.4 \pm 9.4$  second. Moreover, consistent with classical nucleation theory, the delay time is inversely correlated to the concentration of TRF1-CTD clusters, with the brightest clusters nucleating optoTAF15 droplets in  $24.7 \pm 4.7$  second (Group I, Fig. 3J); the dimmest TRF1-CTD clusters nucleate optoTAF15 droplets in  $40.8 \pm 11.4$  second (Group III, Fig. 3J), approaching the long delay times

measured for non TRF1-CTD seeding. These results provide further quantitative evidence that clusters of Pol II can modulate and localize the kinetic nucleation of TAF15 condensation (Fig. 3K).

### **Condensation of FET-family IDRs enhance transcription**

TAF15 is a transcriptional activator, and we wondered whether condensation of optoTAF15 droplets and associated partition of additional of Pol II would impact transcriptional activity. To test this hypothesis, we used 5-ethynyl uridine (EU, a uridine analog) to label nascent RNA transcripts and quantify their spatial location and amount. In cells expressing optoTAF15, but kept in the dark, few nuclei exhibited detectable EU puncta, but instead the EU signal was distributed evenly throughout the nucleoplasm (Fig. S4). By contrast, in blue light-illuminated optoTAF15 cells, an enriched EU signal was detected within optoTAF15 condensates (Fig. 4A and 4B). This enhanced EU signal is due to nascent transcription and is not an artifact of the optoIDR constructs, as no localized EU puncta were detected in cells treated with Act D to inhibit transcription elongation (Fig. S4). Moreover, no puncta were observed in blue light-induced optoDDX4 droplets (Fig. 4A and 4B). OptoEWS and optoFUS showed only a weak EU signal (Fig. 4A and 4B), consistent with our measurements of their weaker CTD recruitment (Fig. 2B). Remarkably, this ability of optoTAF15 condensates to enhance local transcription was also observed in telomere-tethered EGFP-CTD cells (Fig. S4); while telomeres are generally considered transcriptionally quiescent, telomeric repeat-containing RNA (TERRA) is known to be transcribed at telomeres<sup>39</sup>, and this enhanced EU signal at telomeres could reflect local enhancement of TERRA transcription (Fig. S4).

### **Discussion**

In a number of different experimental systems, transcriptional activity has been found to exhibit intermittent activation<sup>24, 40</sup>, with bursts of transcription followed by periods of quiescence. We propose that these intermittent dynamics arise from the “all-or-none” nature of nucleated phase separation. Indeed, our data shows that even in nuclei supersaturated with TAF15, phase separation at a particular genomic location only occurs if the nucleation barrier is overcome; however, OptoTAF15 condensates undergo repeated nucleation at the same location for a limited duration, suggesting that the seeding CTD clusters exist only temporarily. Thus, initial accumulation of CTD at a locus can act as a seed for TAF15 condensate nucleation, subsequently driving additional CTD recruitment. Upon transcriptional elongation and native regulation by CDK7, the CTD of endogenous polymerase is phosphorylated and can no longer interact strongly with TAF15. Ultimately, the balance tips, phosphorylation and dispersal of CTDs results in lowered recruitment of TAF15, the condensate dissolves, and the transcriptional burst stops. Upon recruitment of a new Pol II CTD seed, TAF15 and other transcriptional condensates again can be nucleated to repeat the amplification and transcriptional bursting cycle (Fig. 4C).

Our study to quantify intracellular phase diagrams and nucleation kinetics of transcriptional condensates is only the beginning of the union of fundamental biophysics and transcriptional regulation. Future work will move towards precise understanding of the endogenous energetic barrier that must be overcome to initiate transcriptional bursts at single

loci, and will model the interplay with non-equilibrium driving forces impacting global transcriptional dynamics.

**Acknowledgements.** We thank Michael Levine, Mikko Haataja, Amy Strom and other members of the Brangwynne laboratory for helpful discussions and comments on this manuscript. This work was supported by the Howard Hughes Medical Institute, and grants from the NIH 4D Nucleome Program (U01 DA040601), the Princeton Center for Complex Materials, an NSF supported MRSEC (DMR 1420541), as well as an NSF CAREER award (1253035).

1. Brangwynne, C.P. et al. Germline P granules are liquid droplets that localize by controlled dissolution/condensation. *Science* **324**, 1729-1732 (2009).
2. Li, P. et al. Phase transitions in the assembly of multivalent signalling proteins. *Nature* **483**, 336-340 (2012).
3. Banani, S.F., Lee, H.O., Hyman, A.A. & Rosen, M.K. Biomolecular condensates: organizers of cellular biochemistry. *Nature Reviews Molecular Cell Biology* **18**, 285–298 (2017).
4. Shin, Y. & Brangwynne, C.P. Liquid phase condensation in cell physiology and disease. *Science* **357**, eaaf4382 (2017).
5. Berry, J., Weber, S.C., Vaidya, N., Haataja, M. & Brangwynne, C.P. RNA transcription modulates phase transition-driven nuclear body assembly. *Proceedings of the National Academy of Sciences of the United States of America* **112**, E5237-E5245 (2015).
6. Falahati, H. & Wieschaus, E. Independent active and thermodynamic processes govern the nucleolus assembly in vivo. *Proceedings of the National Academy of Sciences of the United States of America* **114**, E3585-E3585 (2017).
7. Cho, W.K. et al. Mediator and RNA polymerase II clusters associate in transcription-dependent condensates. *Science* **361**, 412-415 (2018).
8. Sabari, B.R. et al. Coactivator condensation at super-enhancers links phase separation and gene control. *Science* **361**, eaar3958 (2018).
9. Chong, S.S. et al. Imaging dynamic and selective low-complexity domain interactions that control gene transcription. *Science* **361**, eaar2555 (2018).
10. Boija, A. et al. Transcription factors activate genes through the phase-separation capacity of their activation domains. *Cell* **175**, 1842-1855 (2018).
11. Levine, M., Cattoglio, C. & Tjian, R. Looping back to leap forward: Transcription enters a new era. *Cell* **157**, 13-25 (2014).
12. Bradner, J.E., Hnisz, D. & Young, R.A. Transcriptional addiction in cancer. *Cell* **168**, 629-643 (2017).
13. Hnisz, D., Shrinivas, K., Young, R.A., Chakraborty, A.K. & Sharp, P.A. A phase separation model for transcriptional control. *Cell* **169**, 13-23 (2017).
14. Shin, Y. et al. Liquid Nuclear Condensates Mechanically Sense and Restructure the Genome. *Cell* **175**, 1481-1491 (2018).
15. Elbaum-Garfinkle, S. et al. The disordered P granule protein LAF-1 drives phase separation into droplets with tunable viscosity and dynamics. *Proceedings of the National Academy of Sciences of the United States of America* **112**, 7189-7194 (2015).

16. Nott, T.J. et al. Phase transition of a disordered nuage protein generates environmentally responsive membraneless organelles. *Molecular Cell* **57**, 936-947 (2015).
17. Smith, J. et al. Spatial patterning of Pgranules by RNA-induced phase separation of the intrinsically-disordered protein MEG-3. *Elife* **5**, e21337 (2016).
18. Feric, M. et al. Coexisting liquid phases underlie nucleolar subcompartments. *Cell* **165**, 1686-1697 (2016).
19. Wang, J. et al. A molecular grammar governing the driving forces for phase separation of prion-like RNA binding proteins. *Cell* **174**, 688-+ (2018).
20. Schwartz, J.C., Cech, T.R. & Parker, R.R. Biochemical properties and biological functions of FET proteins. *Annual Review of Biochemistry* **84**, 355-379 (2015).
21. Kato, M. et al. Cell-free formation of RNA granules: low complexity sequence domains form dynamic fibers within hydrogels. *Cell* **149**, 753-767 (2012).
22. Patel, A. et al. A liquid-to-solid phase transition of the ALS protein FUS accelerated by disease mutation. *Cell* **162**, 1066-1077 (2015).
23. Burke, K.A., Janke, A.M., Rhine, C.L. & Fawzi, N.L. Residue-by-residue view of in vitro FUS granules that bind the c-terminal domain of RNA polymerase II. *Molecular Cell* **60**, 231-241 (2015).
24. Suter, D.M. et al. Mammalian genes are transcribed with widely different bursting kinetics. *Science* **332**, 472-474 (2011).
25. Mitrea, D.M. et al. Nucleophosmin integrates within the nucleolus via multi-modal interactions with proteins displaying R-rich linear motifs and rRNA. *Elife* **5**, e13571 (2016).
26. Shin, Y. et al. Spatiotemporal control of intracellular phase transitions using light-activated optodroplets. *Cell* **168**, 159-171 (2017).
27. Kwon, I. et al. Phosphorylation-regulated binding of RNA polymerase II to fibrous polymers of low-complexity domains. *Cell* **155**, 1049-1060 (2013).
28. Wei, M.T. et al. Phase behaviour of disordered proteins underlying low density and high permeability of liquid organelles. *Nature Chemistry* **9**, 1118-1125 (2017).
29. Lin, Y., Currie, S.L. & Rosen, M.K. Intrinsically disordered sequences enable modulation of protein phase separation through distributed tyrosine motifs. *Journal of Biological Chemistry* **292**, 19110-19120 (2017).
30. Janke, A.M. et al. Lysines in the RNA polymerase II c-terminal domain contribute to TAF15 fibril recruitment. *Biochemistry* **57**, 2549-2563 (2018).
31. Boehning, M. et al. RNA polymerase II clustering through carboxy-terminal domain phase separation. *Nature Structural & Molecular Biology* **25**, 833-840 (2018).
32. Kwiatkowski, N. et al. Targeting transcription regulation in cancer with a covalent CDK7 inhibitor. *Nature* **511**, 616-620 (2014).
33. Wang, Y.B. et al. CDK7-dependent transcriptional addiction in triple-negative breast cancer. *Cell* **163**, 174-186 (2015).
34. Cisse, II et al. Real-time dynamics of RNA Polymerase II clustering in live human cells. *Science* **341**, 664-667 (2013).
35. Cho, W.K. et al. RNA Polymerase II cluster dynamics predict mRNA output in living cells. *Elife* **5**, e13617 (2016).

36. Casse, C., Giannoni, F., Nguyen, V.T., Dubois, M.F. & Bensaude, O. The transcriptional inhibitors, actinomycin D and alpha-amanitin, activate the HIV-1 promoter and favor phosphorylation of the RNA polymerase IIC-terminal domain. *Journal of Biological Chemistry* **274**, 16097-16106 (1999).
37. Bensaude, O. Inhibiting eukaryotic transcription Which compound to choose? How to evaluate its activity? *Transcription* **2**, 103-108 (2011).
38. Vekilov, P.G. Nucleation. *Cryst. Growth Des.* **10**, 5007-5019 (2010).
39. Azzalin, C.M., Reichenbach, P., Khoriantuli, L., Giulotto, E. & Lingner, J. Telomeric repeat-containing RNA and RNA surveillance factors at mammalian chromosome ends. *Science* **318**, 798-801 (2007).
40. Fukaya, T., Lim, B. & Levine, M. Enhancer control of transcriptional bursting. *Cell* **166**, 358-368 (2016).



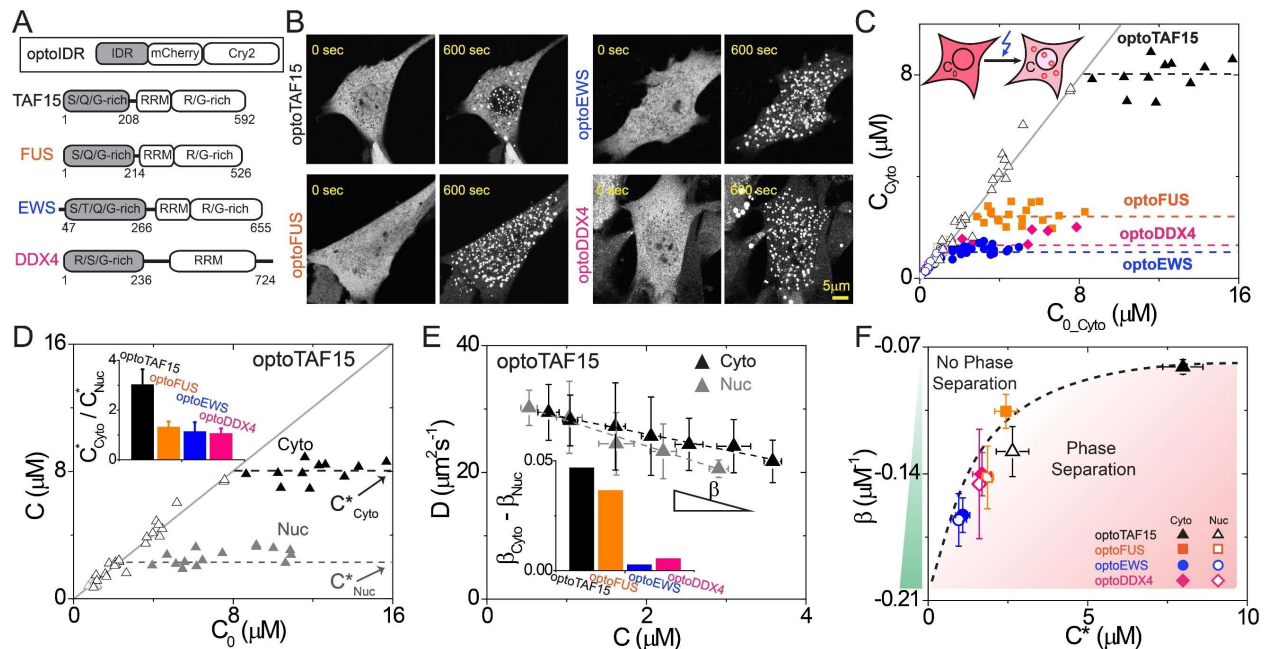

**Fig. 1. Molecular interaction strength drives intracellular phase behavior. (A)** Schematic diagram of optogenetic platform. Each “optoIDR” construct consists of an N-terminal IDR (from TAF15, FUS, EWS, and DDX4) fused to fluorescent protein mCherry and the Cry2 domain. **(B)** Blue light illumination leads to induction of optoIDR condensates. Time since the start of illumination is shown with 0 sec indicating just before illumination. Scale bar is same for all images. **(C)** Steady-state cytoplasmic optoIDR concentration outside clusters ( $C_{\text{Cyto}}$ ) from individual cells under blue light illumination as a function of optoIDR initial concentration ( $C_{0\_Cyto}$ ; i.e., cytoplasmic concentration measured before exposure to blue light). Solid and open symbols represent individual cells with or without light-activated assemblies respectively; solid line has slope of 1 and y-intercept of 0. **(D)** Similar plot as (C) for cytoplasmic (black) and nuclear (gray) optoTAF15, which exhibits a higher saturation concentration in cytoplasm ( $C^*_{\text{Cyto}}$ ) than nucleoplasm ( $C^*_{\text{Nuc}}$ ). (Inset) Fold-change of cytoplasmic to nucleoplasmic saturation concentration of each optoIDR construct tested. Error bars, errors propagated from standard deviations. **(E)** Diffusion coefficient of optoIDR (FCS measurements in dark) as a function of the protein concentration. Data are plotted as mean  $\pm$  standard deviation ( $n = 5-10$  cells). The dashed lines are least-square fits of optoTAF15 data to Eqn. 1. (Inset) OptoTAF15 exhibits the greatest difference of molecular interaction strengths between the cytoplasm ( $\beta_{\text{Cyto}}$ ) and nucleoplasm ( $\beta_{\text{Nuc}}$ ). **(F)** Intracellular phase diagram generated by plotting IDR molecular interaction strength against the optoIDR saturation concentration ( $C^*$ ). Horizontal error bars, standard deviations; vertical error bars, standard errors from fitting. The dashed curve is drawn qualitatively.

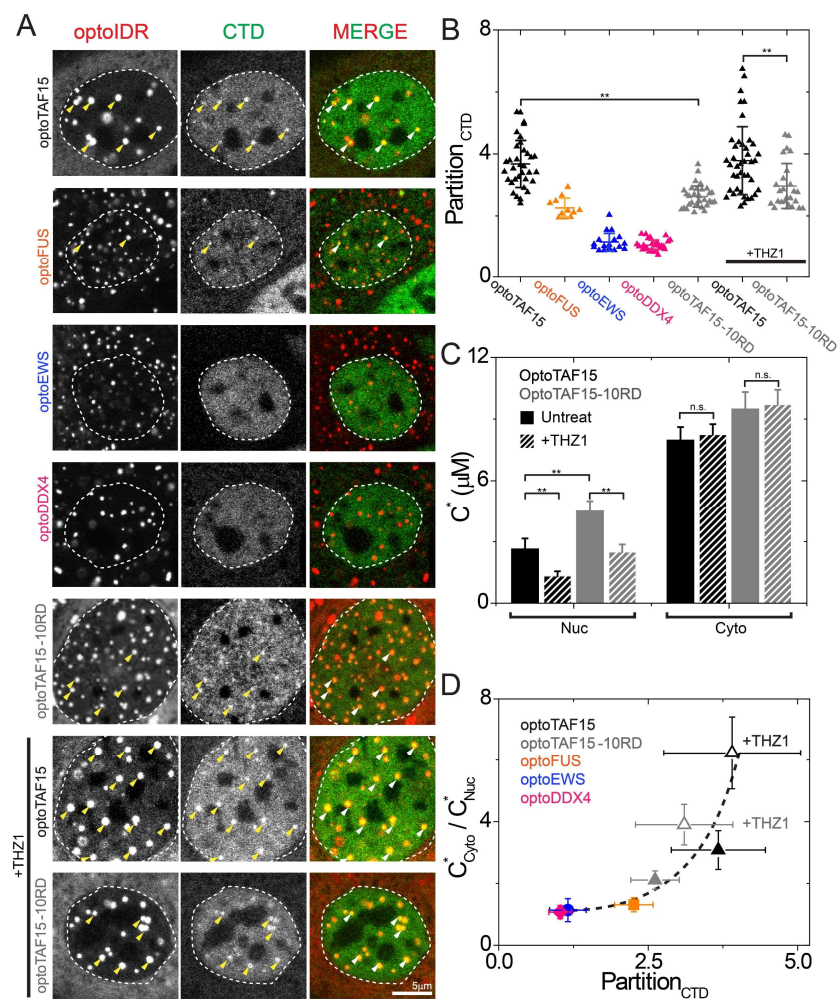

**Fig. 2. Transcriptional condensates colocalize and recruit unphosphorylated CTD.** (A) Fluorescent images of live cells expressing optoIDRs and EGFP-CTD after blue-light illumination. Cell nucleus is outlined by dotted line. Arrowheads point to optoIDR droplets colocalized with recruit CTD. Scale bar same for all images. (B) CTD partition coefficients in various optoIDR droplets. OptoTAF15 droplets exhibit a nearly 4-fold preferential partition of CTD, which is higher than other optoIDRs. The lines indicate the mean and error bars are standard deviations. \*\* denotes p value of unequal variance t-test < 0.01. (C) OptoTAF15-10RD has a higher saturation concentration ( $C^*$ ) than optoTAF15 in nucleoplasm. Inhibition of CTD phosphorylation with THZ1 leads to a decrease in the nucleoplasmic saturation concentration of optoTAF15 and optoTAF15-10RD, but no significant (n.s.) change in cytoplasm. (D) The relative cytoplasmic-to-nucleoplasmic saturation concentration correlates with nuclear CTD partitioning into optoIDR droplets. The dashed curve is qualitative.

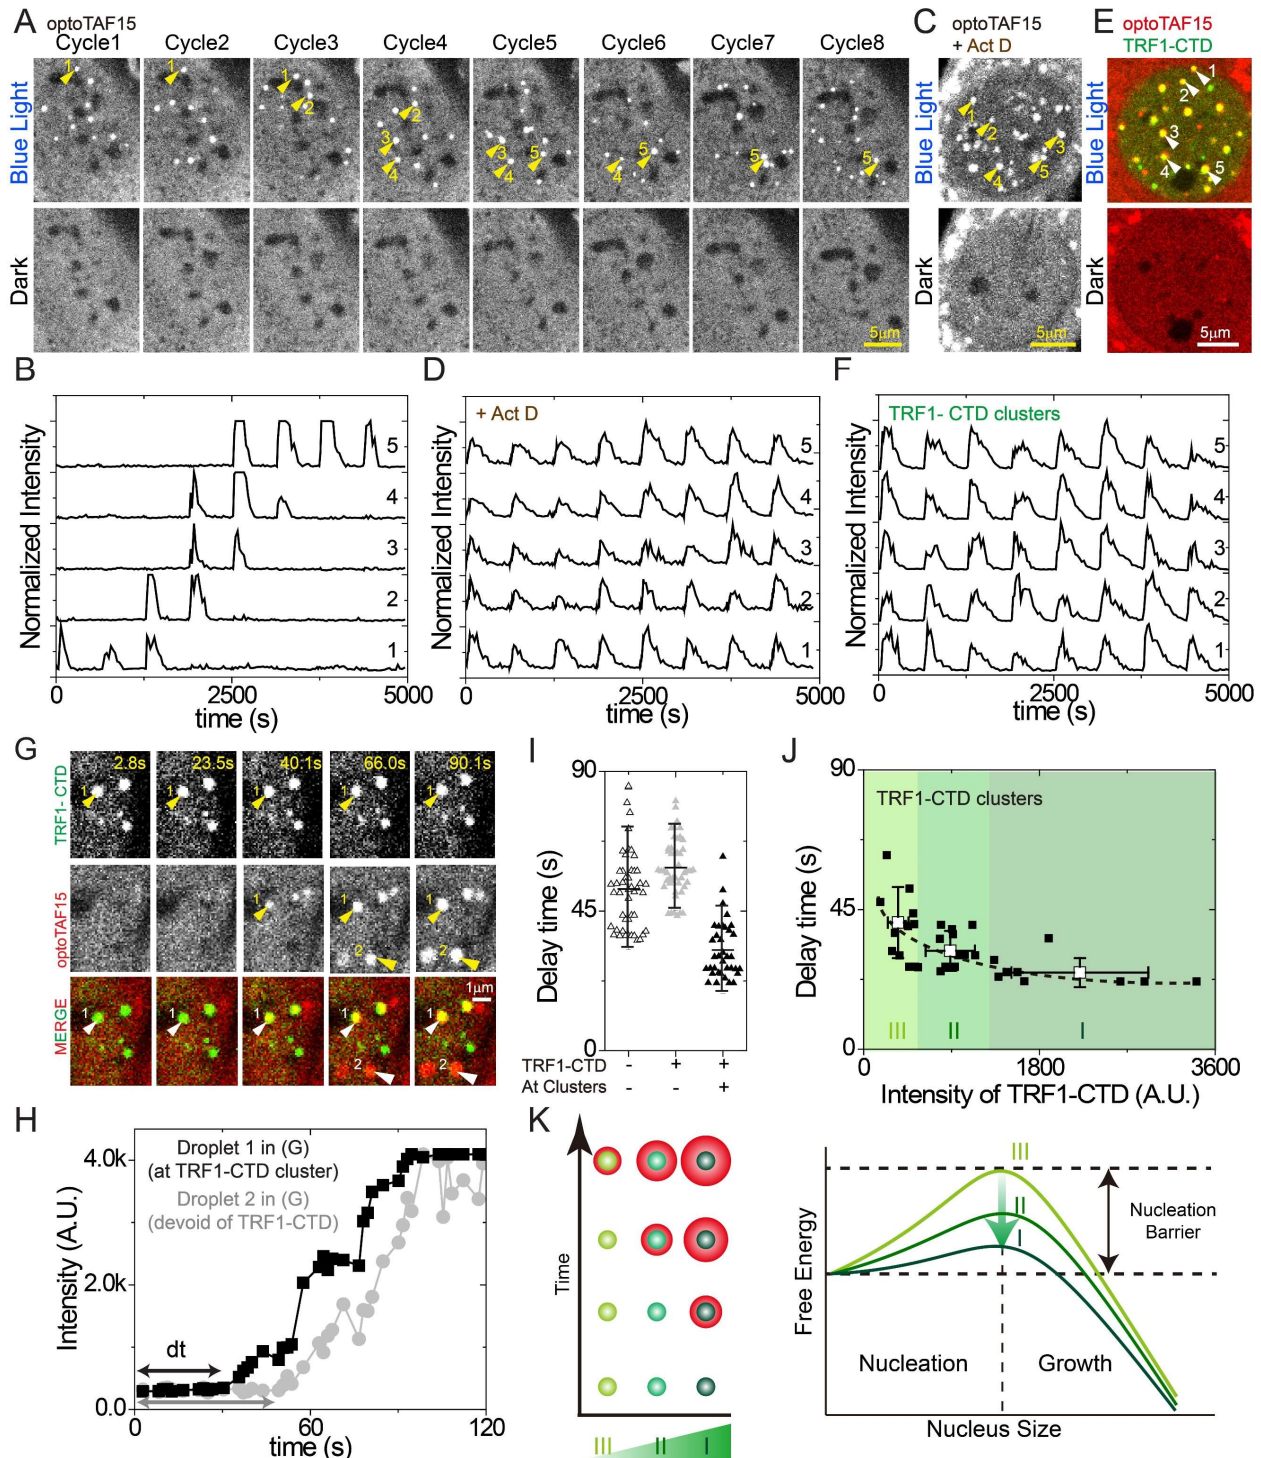

**Fig. 3 Pol II CTD clusters regulate nucleation kinetics of transcriptional condensates. (A)** Fluorescent images of cells expressing optoTAF15 at the end of each “blue light” (or “dark”) session for 8 cycles are shown. Each cycle consists of 1 min of blue-light illumination (activation) and 9 min of dark (deactivation). Arrowheads point to larger droplets which are analyzed in (B). Scale bar, 5μm. **(B)** Time trace of maximal fluorescence intensity in optoTAF15 droplets throughout 8 cycles of blue light on-and-off; analyzed droplets are indicated by arrowheads in

(A). For each trace, intensity is normalized to its maximum. **(C)** Fluorescent images of cells treated with Act D, throughout blue light on-and-off cycles as in (A). **(D)** Time trace for condensates in Act D treated cells shown in (C). **(E)** Fluorescent images of cells co-expressing engineered TRF1-CTD, throughout blue light on-and-off cycles as in (A). **(F)** Time trace for condensates in TRF1-CTD cells shown in (E). **(G, H)** TRF1-CTD sites nucleate significantly faster than optoTAF15 condensates that form elsewhere. Time traces in (H) show maximal fluorescence intensity in two induced optoTAF15 droplets indicated in (G): Black, droplet 1 at a TRF1-CTD cluster; Gray, droplet 2 not associated with any TRF1-CTD cluster. **(I)** Nucleation delay time of optoTAF15. The lines indicate the mean and error bars are standard deviations. Open black symbols indicate the assembly of optoTAF15 condensates in non-TRF1-CTD expressing cells. Black and gray symbols indicate the assembly of optoTAF15 condensates in TRF1-CTD-expressing cells, at TRF1-CTD clusters (black symbols) and elsewhere (gray symbols). **(J)** Nucleation delay time as a function of fluorescence intensity of TRF1-CTD clusters. The dashed curve is qualitative. **(K)** Schematic diagram showing the kinetic effect of nucleation and growth rate during phase separation.

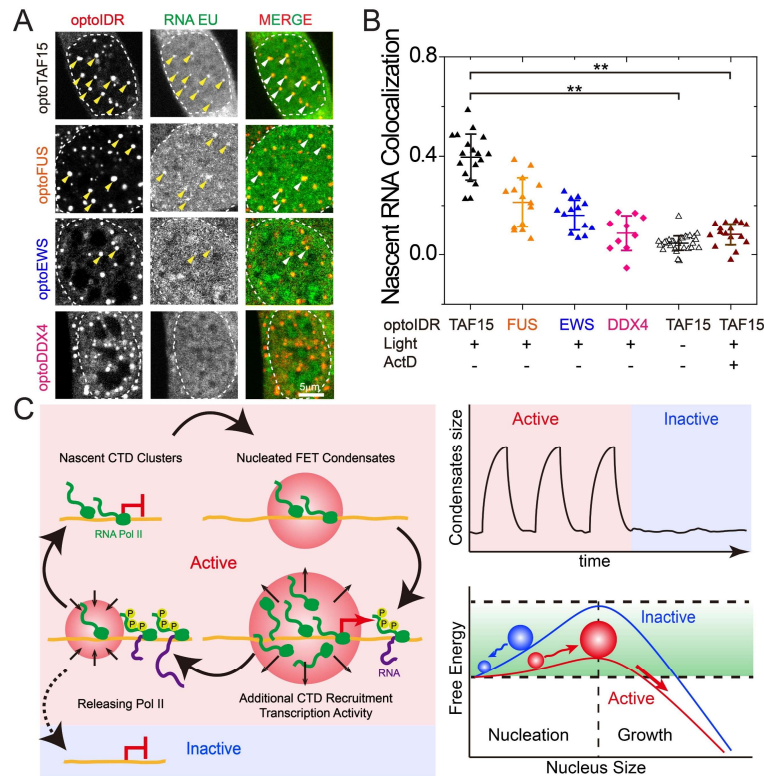

**Fig. 4. Condensation of transcriptional IDRs enhance transcription. (A)** Fluorescent images of cell expressing different optoIDR constructs after blue light-illumination. Nascent RNA transcripts are labeled by EU incorporation. Arrowheads point to puncta of nascent transcripts colocalized with optoTAF15 condensates. Cell nucleus is outlined by dotted line. Scale bar, 5  $\mu$ m. **(B)** Colocalization for nascent RNA various optoIDRs. Degree of colocalization is measured by Pearson's correlation coefficient of nuclear pixel intensity (nucleoli excluded) between RNA EU and optoIDR channels; +1 indicates perfect correlation, 0 no correlation, and -1 perfect anti-correlation. The lines within indicate the mean and error bars are standard deviations. Significance is denoted by \*\* for p value of unequal variance t-test < 0.01. **(C)** Conceptual model for the role of transcription condensate nucleation underlying bursts of gene expression. Transcription condensates heterogeneously nucleate at nascent CTD hubs and recruit additional CTD. These amplified transcription loci further drive transcription elongation.
